# Supplementary material
Source: PubMed Central journal article supplement (PMC4227948)
Supplement: NIHMS610561-supplement-supplement_1.pdf [file NIHMS610561-supplement-supplement_1.pdf]

**Supplementary Figure S1. Quantitative histomorphometric analyses of the TRAIL, TRAIL-R1 and cFLIP expressions in distinct hair follicle compartments after doxorubicin treatment.**

HFs were collected 24h after treatment with 1  $\mu$ M doxorubicin or control and processed for immunofluorescent detection of TRAIL, TRAIL-R1 and cFLIP.

**A** – Images demonstrating expression of TRAIL, TRAIL-R1 and cFLIP in the control and DXR-treated HFs. Areas selected for quantitative histomorphometric analyses in each HF compartment are indicated by dotted line (DP – dermal papilla, Mx – matrix, PC-precortex). Scale bar: 100  $\mu$ m.

**B** – Quantitative histomorphometric data show significant increase of TRAIL, TRAIL-R1 and cFLIP expressions in the precortex and dermal papilla. However, matrix cells show only increase of TRAIL and TRAIL-R1 expression, while cFLIP expression remains at low levels and does not show any changes between the control and DXR-treated HFs (mean  $\pm$  SD, \*\* -  $p < 0.01$ , \*\*\*  $p < 0.001$ ; Student's t-test).

**Supplementary Figure S2. Dynamics of cFLIP expression in the hair follicles after doxorubicin treatment.**

HFs were collected 24h, 48h and 72h after treatment with 1  $\mu$ M doxorubicin and processed for immunohistochemistry or qRT-PCR.

**A:** Marked increase of cFLIP protein expression in differentiating hair shaft keratinocytes (thin arrows) and dermal papilla (asterisk) 24h after doxorubicin treatment. Lack of cFLIP expression in hair matrix keratinocytes at the bottom of hair bulb (thick arrows). Scale bar: 100  $\mu$ m.

**B:** qRT-PCR shows marked increase of cFLIP mRNA expression in the HFs 24h after doxorubicin treatment followed by its decrease on 48h and 72 h after treatment compared to the controls.

a

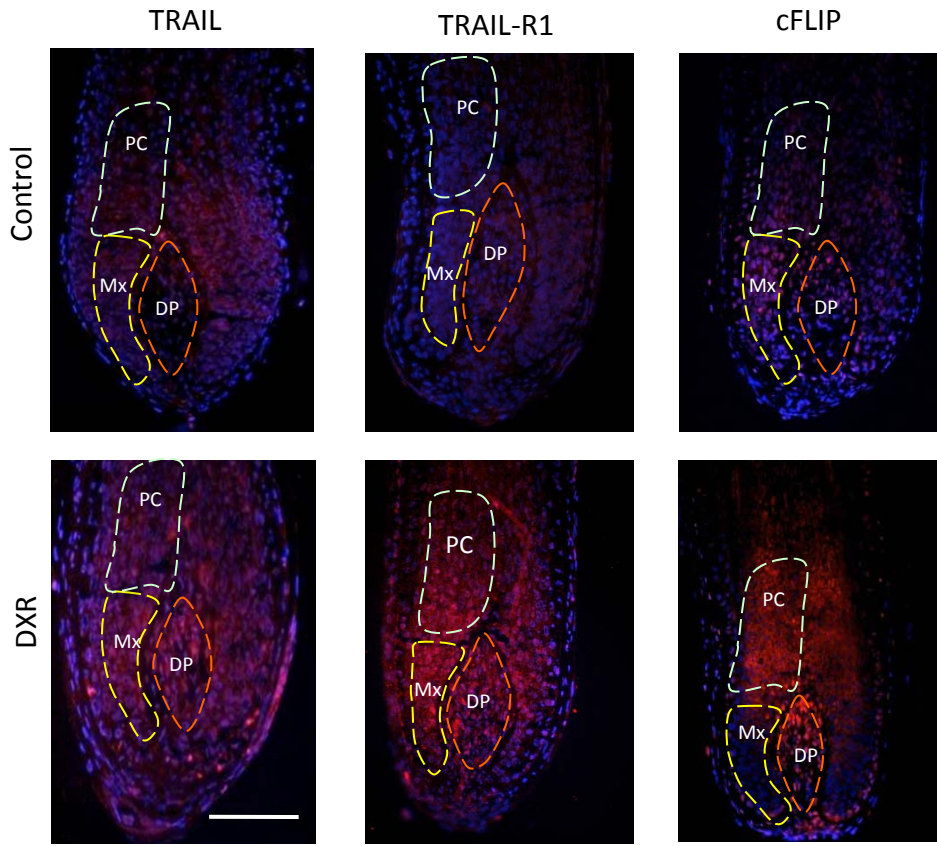

b

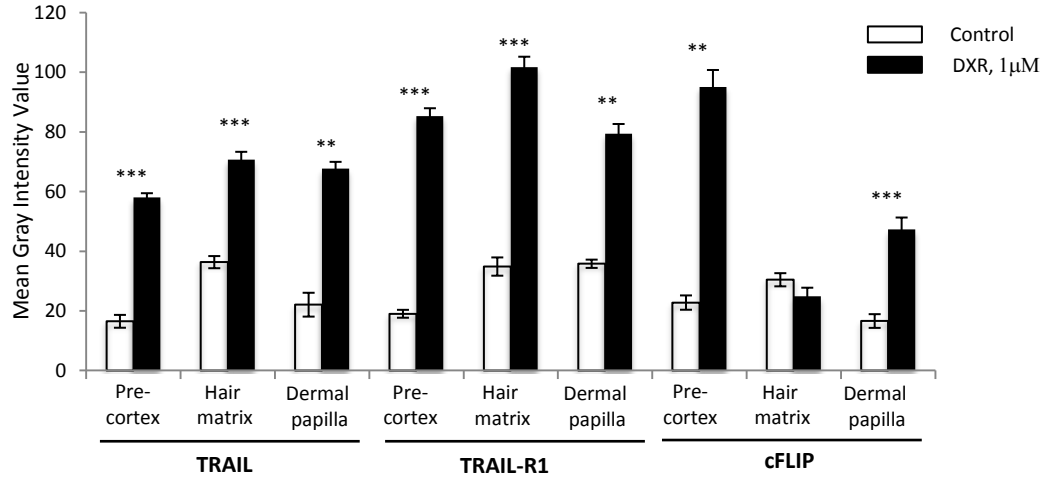

**a**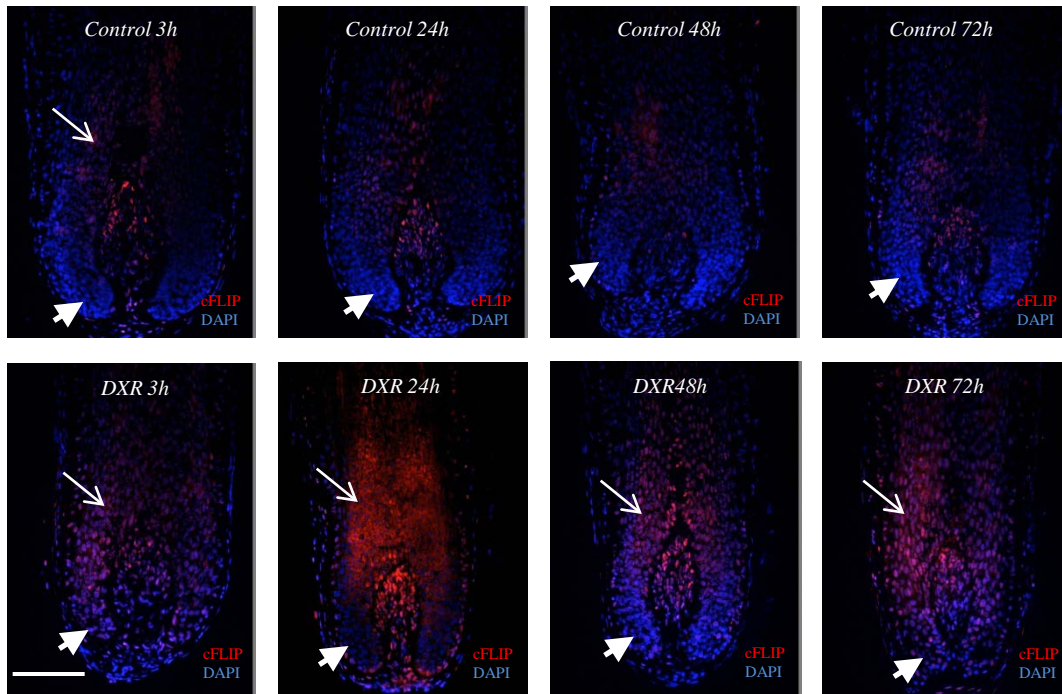**b**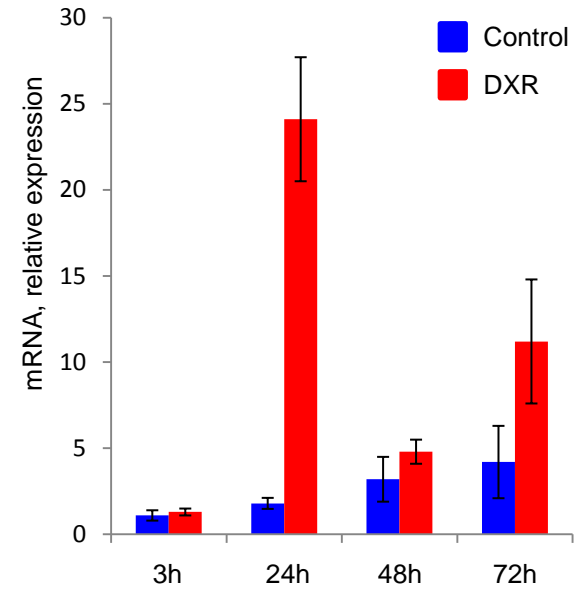

## Supplementary Tables

**Supplementary Table S1. Genes that show 2-fold upregulation in Doxorubicin treated hair follicles versus control.**

| Gene/Function                                          | Gene Symbol | Accession Number | Fold Change |
|--------------------------------------------------------|-------------|------------------|-------------|
| <b>Adhesion/Extracellular Matrix</b>                   |             |                  |             |
| RAN binding protein 9                                  | RANBP9      | AI476722         | 104.29      |
| Protocadherin 20                                       | PCDH20      | BC038756         | 13.69       |
| Limbic system-associated membrane protein              | LSAMP       | R49462           | 9.45        |
| claudin 18                                             | CLDN18      | BE551219         | 8.45        |
| CD28 molecule                                          | CD28        | NM_006139        | 7.45        |
| protocadherin beta 15                                  | PCDHB15     | AV722990         | 3.47        |
| neogenin homolog 1 (chicken)                           | NEO1        | AL355708         | 3.19        |
| integrin-linked kinase                                 | ILK         | NM_004517        | 2.99        |
| pleckstrin homology, Sec7 and coiled-coil domains 1    | PSCD1       | NM_004762        | 2.64        |
| protocadherin beta 2                                   | PCDHB2      | NM_018936        | 2.59        |
| CD209 molecule                                         | CD209       | AY042224         | 2.54        |
| Fibronectin 1                                          | FN1         | AI333596         | 2.49        |
| craniofacial development protein 1                     | CFDP1       | NM_006324        | 2.33        |
| <b>Cell cycle</b>                                      |             |                  |             |
| cyclin-dependent kinase inhibitor 1C (p57, Kip2)       | CDKN1C      | R78668           | 4.7         |
| Proline rich 6                                         | PRR6        | N30008           | 3.71        |
| cyclin J                                               | CCNJ        | NM_019084        | 3.01        |
| cyclin-dependent kinase inhibitor 1A (p21, Cip1)       | CDKN1A      | NM_000389        | 2.87        |
| Sestrin 1                                              | SESN1       | AA705429         | 2.47        |
| <b>Apoptosis</b>                                       |             |                  |             |
| <i>Pro-apoptotic genes</i>                             |             |                  |             |
| RAD50 interactor 1                                     | RINT1       | BC007100         | 33.63       |
| HUS1 checkpoint homolog ( <i>S. pombe</i> )            | HUS1        | NM_004507        | 7           |
| Fas (TNF receptor superfamily, member 6)               | FAS         | NM_000043        | 4.35        |
| tumor necrosis factor receptor superfamily, member 10b | TNFRSF10B   | AF016266         | 4           |
| RAP1 interacting factor homolog (yeast)                | RIF1        | AI003806         | 3.29        |
| tumor protein p53 inducible nuclear protein 1          | TP53INP1    | AW341649         | 2.55        |
| tumor necrosis factor receptor superfamily, member 10a | TNFRSF10A   | W65310           | 2.45        |
| p53-regulated apoptosis-inducing protein 1             | P53AIP1     | NM_022112        | 2.31        |
| tumor necrosis factor (ligand) superfamily, member 15  | TNFSF15     | NM_005118        | 2.1         |
| <i>Anti-apoptotic genes</i>                            |             |                  |             |
| BCL2-related protein A1                                | BCL2A1      | NM_004049        | 21.94       |
| B-cell CLL/lymphoma 2                                  | BCL2        | AU146963         | 3.85        |
| CASP8 and FADD-like apoptosis regulator                | CFLAR       | AF015452         | 3.05        |
| tumor necrosis factor receptor superfamily, member 10d | TNFRSF10D   | AI738556         | 2.61        |
| BRCA1 interacting protein C-terminal helicase 1        | BRIP1       | AF360549         | 2.42        |
| APAF1 interacting protein                              | APIP        | AF131812         | 2.37        |
| B-cell CLL/lymphoma 10                                 | BCL10       | AA994334         | 2.36        |
| B-cell CLL/lymphoma 6, member B (zinc finger protein)  | BCL6B       | AI827455         | 2.27        |
| BRCA1/BRCA2-containing complex, subunit 3              | BRCC3       | S72931           | 2.19        |
| TP53 regulated inhibitor of apoptosis 1                | TRIAP1      | NM_016399        | 2.15        |
| <b>Chromatin Remodeling</b>                            |             |                  |             |
| SATB family member 2                                   | SATB2       | AK025127         | 12.94       |
| Wolf-Hirschhorn syndrome candidate 1-like 1            | WHSC1L1     | NM_023034        | 9.22        |
| Sex comb on midleg homolog 1 ( <i>Drosophila</i> )     | SCMH1       | W93230           | 4.64        |
| Arginine-glutamic acid dipeptide (RE) repeats          | RERE        | AU148274         | 2.88        |

|                                             |         |           |      |
|---------------------------------------------|---------|-----------|------|
| SET and MYND domain containing 3            | SMYD3   | AA434097  | 2.77 |
| chromodomain helicase DNA binding protein 9 | CHD9    | NM_025134 | 2.61 |
| methyltransferase like 7A                   | METTL7A | AF113007  | 2.51 |

#### Cytoskeleton/Cell Differentiation

|                                                  |           |           |       |
|--------------------------------------------------|-----------|-----------|-------|
| keratin associated protein 9-9                   | KRTAP9-9  | NM_030975 | 34.87 |
| keratin associated protein 1-3                   | KRTAP1-3  | NM_030966 | 32.11 |
| keratin associated protein 3-2                   | KRTAP3-2  | AJ406932  | 27.39 |
| keratin associated protein 4-7                   | KRTAP4-7  | AJ406939  | 11.08 |
| melanoma antigen family E, 1                     | MAGEE1    | AI912696  | 8.71  |
| keratin associated protein 2-2                   | KRTAP2-2  | AJ406929  | 8.65  |
| keratin associated protein 9-2                   | KRTAP9-2  | AJ406946  | 8.53  |
| ankyrin repeat domain 44                         | ANKRD44   | AL133087  | 4.6   |
| Myosin VC                                        | MYO5C     | AA004803  | 7.61  |
| keratin associated protein 2-4                   | KRTAP2-4  | NM_030977 | 6.67  |
| keratin associated protein 4-4                   | KRTAP4-4  | AJ296168  | 5.91  |
| keratin associated protein 2-1                   | KRTAP2-1  | BC012486  | 5.29  |
| keratin associated protein 1-1                   | KRTAP1-1  | NM_030967 | 5.12  |
| keratin associated protein 3-3                   | KRTAP3-3  | AJ406933  | 4.14  |
| keratin associated protein 1-5                   | KRTAP1-5  | AJ406928  | 4.02  |
| keratin associated protein 4-15                  | KRTAP4-15 | AJ406945  | 3.67  |
| prothymosin, alpha (gene sequence 28)            | PTMA      | BF686442  | 3.51  |
| keratin associated protein 4-3                   | KRTAP4-3  | AJ406935  | 3.27  |
| Myosin, light polypeptide kinase                 | MYLK      | AL832211  | 3.17  |
| keratin associated protein 4-9                   | KRTAP4-9  | AJ406941  | 3.13  |
| dynein, axonemal, heavy polypeptide 5            | DNAH5     | AW272255  | 3.04  |
| transmembrane protein 19                         | TMEM19    | AW663887  | 2.93  |
| tau tubulin kinase 2                             | TTBK2     | AW294686  | 2.63  |
| keratin associated protein 4-2                   | KRTAP4-2  | AJ406934  | 2.61  |
| septin 8                                         | SPT8      | AI912094  | 2.75  |
| cytotoxic T-lymphocyte-associated protein 4      | CTLA4     | AI733018  | 2.3   |
| collagen, type IV, alpha 3 (Goodpasture antigen) | COL4A3    | U02520    | 2.24  |
| dynein heavy chain domain 2                      | DNHD2     | AI005163  | 2.23  |

#### Metabolism

|                                                               |            |           |       |
|---------------------------------------------------------------|------------|-----------|-------|
| heparan sulfate 2-O-sulfotransferase 1                        | HS2ST1     | AI806674  | 16.65 |
| pleckstrin homology domain containing, family A member 5      | PLEKHA5    | AK026344  | 15.43 |
| solute carrier family 4, sodium bicarbonate cotransporter     | SLC4A4     | AF011390  | 12.5  |
| fatty acid binding protein 7, brain                           | FABP7      | NM_001446 | 9.81  |
| solute carrier family 17 (sodium phosphate), member 4         | SLC17A4    | NM_005495 | 9.43  |
| DDHD domain containing 1                                      | DDHD1      | AW183689  | 8.28  |
| Iduronate 2-sulfatase (Hunter syndrome)                       | IDS        | AI819115  | 6.99  |
| SAM domain and HD domain 1                                    | SAMHD1     | AF147427  | 6.28  |
| aldehyde dehydrogenase 1 family, member A3                    | ALDH1A3    | NM_000693 | 6.11  |
| branched chain aminotransferase 1, cytosolic                  | BCAT1      | AL390172  | 5.47  |
| UDP-GlcNAc:betaGal beta-1,3-N-acetylglucosaminyltransferase 1 | B3GNT1     | AI971627  | 5.04  |
| ST6                                                           | ST6GALNAC5 | AU145390  | 4.92  |
| chromosome 12 open reading frame 5                            | C12orf5    | NM_020375 | 4.42  |
| 3-hydroxymethyl-3-methylglutaryl-Coenzyme A lyase-like 1      | HMGCLL1    | AL137630  | 4.07  |
| leucine rich repeat containing 41                             | LRRC41     | BC042988  | 3.61  |
| PDZ and LIM domain 4                                          | PDLIM4     | BE043700  | 3.57  |
| fibronectin type III domain containing 6                      | FNDC6      | AL578102  | 3.48  |
| choline phosphotransferase 1                                  | CHPT1      | BF940025  | 3.43  |
| ATP-binding cassette, sub-family A (ABC1), member 10          | ABCA10     | AF132201  | 3.35  |
| Nudix (nucleoside diphosphate linked moiety X)-type motif 9   | NUDT9      | BE671532  | 3.27  |
| pentraxin-related gene, rapidly induced by IL-1 beta          | PTX3       | NM_002852 | 3.26  |
| elastase 2, neutrophil                                        | ELA2       | NM_001972 | 3.13  |

|                                                                          |          |           |      |
|--------------------------------------------------------------------------|----------|-----------|------|
| schlafen-like 1                                                          | SLFNL1   | NM_144990 | 3.09 |
| WD repeat domain 63                                                      | WDR63    | AI860874  | 3.05 |
| sorting nexin 24                                                         | SNX24    | AW452218  | 3.02 |
| Vacuolar protein sorting 13 homolog D (S. cerevisiae)                    | VPS13D   | BF724733  | 3    |
| solute carrier family 12 (sodium/potassium/chloride transporters)        | SLC12A1  | BC040138  | 2.89 |
| lysosomal-associated membrane protein 3                                  | LAMP3    | NM_014398 | 2.86 |
| ATPase, Na <sup>+</sup> /K <sup>+</sup> transporting, beta 1 polypeptide | ATP1B1   | AL049331  | 2.81 |
| Acyl-CoA synthetase long-chain family member 4                           | ACSL4    | AF090916  | 2.81 |
| lactase                                                                  | LCT      | NM_002299 | 2.72 |
| SEC31-like 1 (S. cerevisiae)                                             | SEC31L1  | AF086242  | 2.7  |
| D-dopachrome tautomerase                                                 | DDT      | NM_001355 | 2.67 |
| Target of myb1-like 1 (chicken)                                          | TOM1L1   | AA913079  | 2.66 |
| glucosidase I                                                            | GCS1     | BC002804  | 2.66 |
| CUG triplet repeat, RNA binding protein 2                                | CUGBP2   | BE157991  | 2.65 |
| Mitogen-activated protein kinase 9                                       | MAPK9    | AI808345  | 2.64 |
| GM2 ganglioside activator                                                | GM2A     | AL513583  | 2.63 |
| dedicator of cytokinesis 11                                              | DOCK11   | AW968823  | 2.58 |
| FCH and double SH3 domains 2                                             | FCHSD2   | AI535736  | 2.58 |
| dihydropyrimidinase-like 4                                               | DPYSL4   | NM_006426 | 2.49 |
| RAN binding protein 3                                                    | RANBP3   | NM_003624 | 2.45 |
| synaptotagmin VII                                                        | SYT7     | AA633076  | 2.43 |
| Abhydrolase domain containing 3                                          | ABHD3    | BF477544  | 2.42 |
| heat shock 22kDa protein 8                                               | HSPB8    | BF109740  | 2.41 |
| serine/threonine kinase 32A                                              | STK32A   | NM_145001 | 2.41 |
| hydroxysteroid dehydrogenase like 2                                      | HSDL2    | BM014995  | 2.4  |
|                                                                          | SBDS /// |           |      |
| Shwachman-Bodian-Diamond syndrome                                        | SBDSP    | BC010183  | 2.4  |
| UDP-Gal:betaGlcNAc beta 1,4- galactosyltransferase                       | B4GALT6  | AV760769  | 2.34 |
| Deoxythymidylate kinase (thymidylate kinase)                             | DTYMK    | AU121224  | 2.29 |
| Sorting nexin 12                                                         | SNX12    | AI674915  | 2.31 |
| Phospholipase C, epsilon 1                                               | PLCE1    | AK098548  | 2.22 |
| PCTAIRE protein kinase 2                                                 | PCK2     | AA436887  | 2.22 |
| Leucine rich repeat containing 8 family, member D                        | LRRC8D   | AK025238  | 2.21 |
| cytochrome P450, family 24, subfamily A, polypeptide 1                   | CYP24A1  | NM_000782 | 2.2  |

### Proteolysis

|                                                   |        |           |      |
|---------------------------------------------------|--------|-----------|------|
| protease, serine, 7 (enterokinase)                | PRSS7  | NM_002772 | 6.68 |
| Itchy homolog E3 ubiquitin protein ligase (mouse) | ITCH   | AI968264  | 4.56 |
| zinc and ring finger 1                            | ZNRF1  | AI144394  | 4.46 |
| Ubiquitin specific peptidase 49                   | USP49  | AU144129  | 3.61 |
| DnaJ (Hsp40) homolog, subfamily B, member 2       | DNAJB2 | NM_006736 | 2.95 |
| Ring finger protein 187                           | RNF187 | BC015435  | 2.86 |
| calpain 6                                         | CAPN6  | NM_014289 | 2.56 |
| Carboxypeptidase M                                | CPM    | AI422414  | 2.44 |

### RNA Processing

|                                                        |       |          |      |
|--------------------------------------------------------|-------|----------|------|
| Threonyl-tRNA synthetase                               | TARS  | AA701890 | 3.03 |
| cleavage and polyadenylation specific factor 2, 100kDa | CPSF2 | AA583986 | 2.56 |
| Treacher Collins-Franceschetti syndrome 1              | TCOF1 | AW167713 | 2.48 |

### Signaling

|                                               |        |          |       |
|-----------------------------------------------|--------|----------|-------|
| sodium channel, voltage-gated, type XI, alpha | SCN11A | AF188679 | 40.73 |
| DEP domain containing 2                       | DEPDC2 | BC036055 | 32.15 |
| prolactin releasing hormone receptor          | PRLHR  | AL563031 | 18.31 |
| DEP domain containing 4                       | DEPDC4 | BC039480 | 16.34 |
| tuberous sclerosis 2                          | TSC2   | AC005600 | 14.19 |
| NFAT activating protein with ITAM motif 1     | NFAM1  | AI492017 | 10.97 |
| R7 binding protein                            | R7BP   | H05023   | 7.07  |

|                                                                    |           |           |       |
|--------------------------------------------------------------------|-----------|-----------|-------|
| T cell receptor alpha locus                                        | TRA@      | AE000659  | 5.69  |
| transient receptor potential cation channel, subfamily M, member 3 | TRPM3     | AL136545  | 5.34  |
| stathmin-like 3                                                    | STMN3     | NM_015894 | 5.1   |
| ras homolog gene family, member F (in filopodia)                   | RHOF      | BC018208  | 5.06  |
| adrenergic, beta, receptor kinase 1                                | ADRBK1    | M80776    | 5.04  |
| Src-like-adaptor /// Src-like-adaptor                              | SLA       | NM_006748 | 4.92  |
| receptor transporter protein 1                                     | RTP1      | NM_153708 | 4.64  |
| Glutamate receptor, metabotropic 5                                 | GRM5      | D60132    | 4.16  |
| adrenergic, alpha-1D-, receptor                                    | ADRA1D    | M76446    | 4.02  |
| FIP1 like 1 (S. cerevisiae)                                        | FIP1L1    | BC017724  | 3.87  |
| CUG triplet repeat, RNA binding protein 2                          | CUGBP2    | AI125337  | 3.83  |
| progesterone and adipoQ receptor family member IX                  | PAQR9     | AK093381  | 3.49  |
| Phosphodiesterase 4D, cAMP-specific                                | PDE4D     | AI452799  | 3.49  |
| SH3 and cysteine rich domain 3                                     | STAC3     | AW663959  | 3.27  |
| Rho guanine nucleotide exchange factor (GEF) 7                     | ARHGEF7   | AI040887  | 3.19  |
| Septin 6                                                           | 38966     | T91323    | 3.16  |
| A kinase (PRKA) anchor protein 13                                  | AKAP13    | AL133427  | 3.14  |
| elastase 2, neutrophil                                             | ELA2      | NM_001972 | 3.13  |
| Mitogen-activated protein kinase kinase kinase 7                   | MAP3K7IP2 | AA769450  | 3.11  |
| pygopus homolog 1 (Drosophila)                                     | PYGO1     | AL049925  | 3.1   |
| Triple functional domain (PTPRF interacting)                       | TRIO      | AW449903  | 2.97  |
| low density lipoprotein receptor-related protein 6                 | LRP6      | AF074264  | 2.92  |
| GTP binding protein 2                                              | GTPBP2    | AI890529  | 2.9   |
| olfactory receptor, family 2, subfamily C, member 1                | OR2C1     | NM_012368 | 2.89  |
| Transforming growth factor, beta receptor I                        | TGFBRI    | AV700621  | 2.87  |
| Protein tyrosine phosphatase type IVA, member 1                    | PTP4A1    | AA700206  | 2.8   |
| UL16 binding protein 1                                             | ULBP1     | NM_025218 | 2.8   |
| G protein-coupled receptor, family C, group 5, member C            | GPRC5C    | AK000249  | 2.7   |
| proprotein convertase subtilisin/kexin type 2                      | PCSK2     | AL031664  | 2.68  |
| Leucine-rich repeat-containing G protein-coupled receptor 5        | LGR5      | AI962439  | 2.67  |
| interleukin 1 receptor accessory protein                           | IL1RAP    | NM_002182 | 2.54  |
| low density lipoprotein-related protein 12                         | LRP12     | NM_024937 | 2.53  |
| Quaking homolog, KH domain RNA binding (mouse)                     | QKI       | BC029474  | 2.39  |
| B-cell linker                                                      | BLNK      | AA931562  | 2.39  |
| mitogen-activated protein kinase kinase 7                          | MAP2K7    | AI090153  | 2.35  |
| interferon (alpha, beta and omega) receptor 1                      | IFNAR1    | AA811138  | 2.34  |
| SNF1-like kinase 2                                                 | SNF1LK2   | AL831884  | 2.32  |
| Lymphocyte-specific protein 1                                      | LSP1      | AA630955  | 2.32  |
| RAR-related orphan receptor A                                      | RORA      | BC040965  | 2.32  |
| activin A receptor, type IC                                        | ACVR1C    | NM_145259 | 2.31  |
| urocortin 3 (stresscopin)                                          | UCN3      | NM_053049 | 2.17  |
| insulin-like growth factor 1 receptor                              | IGF1R     | NM_015883 | 2.17  |
| WNT inhibitory factor 1                                            | WIF1      | NM_007191 | 2.16  |
| <b>Transcription</b>                                               |           |           |       |
| actin-binding Rho activating protein                               | ABRA      | AL832152  | 19.51 |
| maelstrom homolog (Drosophila)                                     | MAEL      | AA446073  | 10.48 |
| zinc finger protein 227                                            | ZNF227    | AC074331  | 10.32 |
| POU domain, class 2, transcription factor 1                        | POU2F1    | BC041822  | 9.71  |
| Sine oculis homeobox homolog 1 (Drosophila)                        | SIX1      | N79004    | 6.49  |
| Zinc finger protein 331                                            | ZNF331    | AK022474  | 5.66  |
| PR domain containing 4                                             | PRDM4     | AI806319  | 5.26  |
| four and a half LIM domains 1                                      | FHL1      | AF063002  | 5.12  |
| B double prime 1                                                   | BDP1      | AJ238520  | 5.06  |
| zinc finger protein 441                                            | ZNF441    | NM_152355 | 4.28  |
| zinc finger, MYND-type containing 10                               | ZMYND10   | AC002481  | 3.68  |
| TAF15 RNA polymerase II, TATA box binding protein                  | TAF15     | AW296067  | 3.23  |

|                                                                  |          |           |      |
|------------------------------------------------------------------|----------|-----------|------|
| transducin-like enhancer of split 4 (E(sp1) homolog, Drosophila) | TLE4     | AA705845  | 3.19 |
| ets variant gene 6 (TEL oncogene)                                | ETV6     | NM_001987 | 3.16 |
| excision repair cross-complementing rodent repair deficiency     | ERCC8    | BC009793  | 3.04 |
| E2F transcription factor 3                                       | E2F3     | AI640363  | 3.03 |
| Transcription factor 12                                          | TCF12    | AL442094  | 3.02 |
| zinc finger protein 114                                          | ZNF114   | NM_153608 | 2.99 |
| Regulatory factor X domain containing 2                          | RFXDC2   | BC008462  | 2.93 |
| hairy and enhancer of split 6 (Drosophila)                       | HES6     | AW249678  | 2.9  |
| signal transducer and activator of transcription 5B              | STAT5B   | NM_012448 | 2.86 |
| Regulatory factor X, 3 (influences HLA class II expression)      | RFX3     | AL157466  | 2.81 |
| protein phosphatase 5, catalytic subunit                         | PPP5C    | BC000750  | 2.8  |
| Polymerase (RNA) II (DNA directed) polypeptide E, 25kDa          | POLR2E   | AI439416  | 2.68 |
| Trichorhinophalangeal syndrome I                                 | TRPS1    | T56980    | 2.65 |
| Transcription factor 7-like 2 (T-cell specific, HMG-box)         | TCF7L2   | AL832684  | 2.54 |
| transducin-like enhancer of split 4 (E(sp1) homolog, Drosophila) | TLE4     | BF217301  | 2.5  |
| T-box 2                                                          | TBX2     | NM_005994 | 2.5  |
| MYST histone acetyltransferase (monocytic leukemia) 3            | MYST3    | AK027361  | 2.35 |
| LIM domains containing 1                                         | LIMD1    | M80651    | 2.34 |
| Thyroid hormone receptor associated protein 2                    | THRAP2   | AK021554  | 2.33 |
| ring finger protein 123                                          | RNF123   | AL136729  | 2.3  |
| zinc finger, CCHC domain containing 12                           | ZCCHC12  | AV725825  | 2.29 |
| ring finger protein 165                                          | RNF165   | BF529886  | 2.27 |
| TGFB-induced factor (TALE family homeobox)                       | TGIF     | AL832409  | 2.24 |
| Steroid receptor RNA activator 1                                 | SRA1     | AU148255  | 2.23 |
| engrailed homolog 1                                              | EN1      | NM_001426 | 2.21 |
| small nuclear RNA activating complex, polypeptide 3, 50kDa       | SNAPC3   | AI066599  | 2.21 |
| Rtf1, Paf1/RNA polymerase II complex component                   | RTF1     | AI192081  | 2.14 |
| Sp3 transcription factor                                         | SP3      | AW470841  | 2.13 |
| <b>Others</b>                                                    |          |           |      |
| KIAA1217                                                         | KIAA1217 | AA777639  | 3.31 |
| RNA binding motif, single stranded interacting protein 1         | RBMS1    | BF439728  | 2.8  |



**Supplementary Table S2. Genes that show 2-fold downregulation in Doxorubicin treated hair follicles versus control.**

| Gene/Function                                                   | Gene    | Accession Number | Fold Change |
|-----------------------------------------------------------------|---------|------------------|-------------|
| <b>Adhesion/Extracellular Matrix</b>                            |         |                  |             |
| Down syndrome cell adhesion molecule transmembrane protein 67   | DSCAM   | BE503065         | 17.26       |
| Tetraspanin 5                                                   | TMEM67  | NM_153704        | 11.8        |
| C-type lectin domain family 4, member E                         | TSPAN5  | AL832038         | 8.67        |
| hyaluronan and proteoglycan link protein 1                      | CLEC4E  | NM_014358        | 8.62        |
| CD80 molecule                                                   | HAPLN1  | U43328           | 7.39        |
| discs, large homolog 1 (Drosophila)                             | CD80    | BC042665         | 6.71        |
| Ectonucleoside triphosphate diphosphohydrolase 1                | DLG1    | NM_004087        | 3.84        |
| CD93 molecule                                                   | ENTPD1  | BF508564         | 3.47        |
| laminin, alpha 2 (merosin)                                      | CD93    | NM_012072        | 3.18        |
| cadherin 11, type 2, OB-cadherin (osteoblast)                   | LAMA2   | AK026829         | 3.17        |
| selectin E (endothelial adhesion molecule 1)                    | CDH11   | D21254           | 3.12        |
| Neurexin 3                                                      | SELE    | NM_000450        | 3.07        |
| mucin 13, cell surface associated                               | NRXN3   | AL134451         | 2.94        |
| EGF-like repeats and discoidin I-like domains 3                 | MUC13   | NM_017648        | 2.73        |
| claudin 8                                                       | EDIL3   | AA053711         | 2.73        |
| thrombospondin 1                                                | CLDN8   | AL049977         | 2.61        |
| nidogen 1                                                       | THBS1   | NM_003246        | 2.61        |
| LIM domain containing preferred translocation partner in lipoma | NID1    | BF940043         | 2.55        |
| leupaxin                                                        | LPP     | T86427           | 2.49        |
| neural cell adhesion molecule 2                                 | LPXN    | AA250935         | 2.45        |
| FAT tumor suppressor homolog 4 (Drosophila)                     | NCAM2   | NM_004540        | 2.38        |
| gap junction protein, alpha 4, 37kDa (connexin 37)              | FAT4    | NM_024582        | 2.38        |
| Protocadherin 11 Y-linked                                       | GJA4    | M96789           | 2.35        |
| Tenascin C (hexabrachion)                                       | PCDH11Y | AI732427         | 2.35        |
| BH-protocadherin (brain-heart)                                  | TNC     | BF434846         | 2.31        |
| desmocollin 2                                                   | PCDH7   | AB006756         | 2.3         |
| cadherin-like 24                                                | DSC2    | AU154691         | 2.22        |
| Thy-1 cell surface antigen                                      | CDH24   | NM_144985        | 2.17        |
|                                                                 | THY1    | AA218868         | 2.15        |
| <b>Cell cycle</b>                                               |         |                  |             |
| Cdc42 GTPase-activating protein                                 | CDGAP   | AB033030         | 8.52        |
| retinoblastoma-like 1 (p107)                                    | RBL1    | BG387892         | 2.63        |
| Cdk5 and Abl enzyme substrate 1                                 | CABLES1 | AI889160         | 2.37        |
| <b>Apoptosis</b>                                                |         |                  |             |
| <i>Pro-apoptotic genes</i>                                      |         |                  |             |
| programmed cell death 4 (neoplastic transformation inhibitor)   | PDCD4   | BC043171         | 3.36        |
| apoptotic chromatin condensation inducer 1                      | ACIN1   | NM_014977        | 2.56        |
| caspase 4, apoptosis-related cysteine peptidase                 | CASP4   | U25804           | 2.24        |
| programmed cell death 6 /// aryl-hydrocarbon receptor repressor | PDCD6   | AB033060         | 2.18        |
| NIMA (never in mitosis gene a)-related kinase 1                 | NEK1    | AK024912         | 2.54        |
| <b>Chromatin Remodeling</b>                                     |         |                  |             |
| helicase (DNA) B                                                | HELB    | NM_033647        | 9.96        |
| L(3)mbt-like 4 (Drosophila)                                     | L3MBTL4 | AK026733         | 4.86        |
| nucleolar protein with MIF4G domain 1                           | NOM1    | AI419857         | 4.27        |
| SET domain containing 2                                         | SETD2   | AF049103         | 2.26        |

**Cytoskeleton/Cell Differentiation**

|                                                                                   |                                        |           |       |
|-----------------------------------------------------------------------------------|----------------------------------------|-----------|-------|
| Tumor protein D52                                                                 | TPD52                                  | BF110792  | 23.21 |
| cripto, FRL-1, cryptic family 1 /// similar to cryptic plexin domain containing 1 | CFC1 /// LOC653275                     | AF312769  | 8.63  |
| CUB and Sushi multiple domains 1                                                  | PLXDC1                                 | AF070526  | 8.52  |
| Yip1 domain family, member 4                                                      | CSMD1                                  | BC016404  | 7.8   |
| collagen, type III, alpha 1 (Ehlers-Danlos syndrome type IV)                      | YIPF4                                  | BG168199  | 6     |
| microfibrillar-associated protein 2                                               | COL3A1                                 | AU144167  | 4.51  |
| fibrillin 1                                                                       | MFAP2                                  | NM_017459 | 3.91  |
| collagen, type IV, alpha 2                                                        | FBN1                                   | NM_000138 | 3.62  |
| Kinesin family member 23                                                          | COL4A2                                 | X05610    | 3.49  |
| Actin related protein 2/3 complex, subunit 5, 16kDa                               | KIF23                                  | AW192521  | 3.43  |
| keratin 17                                                                        | ARPC5                                  | BE552357  | 3.22  |
| Microtubule-associated protein 4                                                  | KRT17                                  | NM_000422 | 3.15  |
| decorin                                                                           | MAP4                                   | T75585    | 3.14  |
| keratin 16 (focal non-epidermolytic palmoplantar keratoderma)                     | DCN                                    | AF138302  | 3.1   |
| collagen, type VI, alpha 3                                                        | KRT16                                  | AF061812  | 3.09  |
| collagen, type I, alpha 2                                                         | COL6A3                                 | NM_004369 | 3.05  |
| microfibrillar associated protein 5                                               | COL1A2                                 | NM_000089 | 3.01  |
| keratin, hair, acidic, 3B                                                         | MFAP5                                  | AW665892  | 2.99  |
| keratin 6A /// keratin 6C /// keratin 6E                                          | KRTHA3B                                | NM_002279 | 2.76  |
| pleckstrin homology domain containing, family H member 2                          | KRT6A                                  | J00269    | 2.69  |
| keratin 6A /// keratin 6B /// keratin 6C /// keratin 6E                           | PLEKHH2                                | AI913749  | 2.59  |
| keratin 6B                                                                        | KRT6A /// KRT6B /// KRT6C<br>/// KRT6E | AL569511  | 2.4   |
| anillin, actin binding protein (scraps homolog, Drosophila)                       | KRT6B                                  | AI831452  | 2.3   |
| lumican                                                                           | ANLN                                   | NM_018685 | 2.22  |
| septin 6                                                                          | LUM                                    | NM_002345 | 2.2   |
|                                                                                   | SPT6                                   | D50918    | 2.14  |

**Metabolism**

|                                                                 |           |           |       |
|-----------------------------------------------------------------|-----------|-----------|-------|
| Methylcrotonoyl-Coenzyme A carboxylase 1 (alpha)                | MCCC1     | AI298089  | 32.87 |
| ATPase, (Na+)/K+ transporting, beta 4 polypeptide               | ATP1B4    | NM_012069 | 18.94 |
| START domain containing 6                                       | STARD6    | NM_139171 | 12.59 |
| acyl-Coenzyme A dehydrogenase family, member 10                 | ACAD10    | NM_025247 | 12.19 |
| aldo-keto reductase family 1, member C3                         | AKR1C3    | AB018580  | 12    |
| ATPase, Class I, type 8B, member 3                              | ATP8B3    | BC033179  | 10    |
| aldolase C, fructose-bisphosphate                               | ALDOC     | NM_005165 | 8.88  |
| chromosome 18 open reading frame 1                              | C18orf1   | NM_004338 | 8.73  |
| leucine rich repeat containing 39                               | LRRC39    | AL832694  | 8.3   |
| lactamase, beta                                                 | LACTB     | NM_171846 | 7     |
| SCC-112 protein                                                 | SCC-112   | AW991219  | 5.85  |
| glycosyltransferase 8 domain containing 2                       | GLT8D2    | W63754    | 5.47  |
| Farnesyl-diphosphate farnesyltransferase 1                      | FDFT1     | AA873729  | 4.94  |
| peptidase inhibitor 15                                          | PI15      | AI088609  | 4.85  |
| Amiloride binding protein 1 (amine oxidase (copper-containing)) | ABP1      | AA514370  | 4.56  |
| Ecotropic viral integration site 1                              | EVI1      | BE049061  | 4.13  |
| ATPase type 13A4                                                | ATP13A4   | BG059633  | 4.05  |
| similar to metallo-beta-lactamase superfamily protein           | LOC153364 | BC038230  | 4.02  |
| cytochrome P450, family 3, subfamily A, polypeptide 4           | CYP3A4    | NM_017460 | 4     |
| alpha-methylacyl-CoA racemase                                   | AMACR     | AI796120  | 3.62  |
| mucolin 3                                                       | MCOLN3    | AW665790  | 3.61  |
| sulfotransferase family, cytosolic, 1C, member 2                | SULT1C2   | NM_006588 | 3.6   |

|                                                                    |          |           |       |
|--------------------------------------------------------------------|----------|-----------|-------|
| hydroxysteroid (11-beta) dehydrogenase 1                           | HSD11B1  | NM_005525 | 3.47  |
| phospholipase A2, group XIIB                                       | PLA2G12B | BF939574  | 3.44  |
| gliomedin                                                          | GLDN     | AW006648  | 3.4   |
| unc-51-like kinase 4 (C. elegans)                                  | ULK4     | NM_017886 | 3.31  |
| lipase, endothelial                                                | LIPG     | NM_006033 | 3.16  |
| ureidopropionase, beta                                             | UPB1     | AF163312  | 3.13  |
| ubiquitously transcribed tetratricopeptide repeat, X chromosome    | UTX      | AI140752  | 2.98  |
| sestrin 3                                                          | SESN3    | BF685808  | 2.94  |
| Dynamamin 1-like                                                   | DNM1L    | AA131302  | 2.87  |
| prostaglandin-endoperoxide synthase 1                              | PTGS1    | BE613133  | 2.81  |
| transient receptor potential cation channel, subfamily M, member 2 | TRPM2    | AI051254  | 2.78  |
| pyruvate dehydrogenase kinase, isozyme 2                           | PDK2     | AL574319  | 2.72  |
| ferrochelatase (protoporphyrin)                                    | FECH     | AU152635  | 2.69  |
| cytochrome P450, family 20, subfamily A, polypeptide 1             | CYP20A1  | NM_020674 | 2.68  |
| F-box and leucine-rich repeat protein 17                           | FBXL17   | BE380031  | 2.61  |
| phospholipase A2, group IB (pancreas)                              | PLA2G1B  | NM_000928 | 2.6   |
| Synaptosomal-associated protein, 25kDa                             | SNAP25   | AI806346  | 2.54  |
| downregulated in ovarian cancer 1                                  | DOC1     | NM_014890 | 2.53  |
| lysyl oxidase-like 2                                               | LOXL2    | NM_002318 | 2.52  |
| 6-phosphogluconolactonase                                          | PGLS     | AA694178  | 2.5   |
| Mannosyl                                                           | MGAT4A   | BC031487  | 2.45  |
| aminolevulinic acid, delta-, dehydratase                           | ALAD     | BC000977  | 2.45  |
| arylacetamide deacetylase-like 2                                   | AADACL2  | AA027115  | 2.39  |
| glutamic-oxaloacetic transaminase 1-like 1                         | GOT1L1   | NM_152413 | 2.38  |
| transmembrane 4 L six family member 1                              | TM4SF1   | AI760128  | 2.38  |
| hemoglobin, beta /// hemoglobin, beta                              | HBB      | AF349114  | 2.37  |
| HERV-H LTR-associating 2                                           | HHLA2    | AK026893  | 2.31  |
| leucine rich repeat containing 46                                  | LRRC46   | AL537303  | 2.27  |
| hyaluronan synthase 3                                              | HAS3     | AF232772  | 2.2   |
| HECT, C2 and WW domain containing E3 ubiquitin protein ligase 2    | HECW2    | AL390186  | 2.13  |
| <b>Proteolysis</b>                                                 |          |           |       |
| N-acetylated alpha-linked acidic dipeptidase 2                     | NAALAD2  | BC038840  | 11.36 |
| Ubiquitin specific peptidase 53                                    | USP53    | BF196943  | 4.52  |
| serpin peptidase inhibitor, clade A                                | SERPINA3 | NM_001085 | 3.33  |
| kallikrein 13                                                      | KLK13    | AL050220  | 3.27  |
| Proteasome (prosome, macropain) subunit, beta type, 7              | PSMB7    | AI762915  | 2.85  |
| complement factor D (adipsin)                                      | CFD      | NM_001928 | 2.82  |
| proprotein convertase subtilisin/kexin type 5                      | PCSK5    | NM_006200 | 2.82  |
| ADAM metallopeptidase with thrombospondin type 1 motif, 5          | ADAMTS5  | BF060767  | 2.81  |
| ADAM metallopeptidase with thrombospondin type 1 motif, 9          | ADAMTS9  | AL832835  | 2.75  |
| ring finger protein 128                                            | RNF128   | NM_024539 | 2.61  |
| Ubiquitin specific peptidase 40                                    | USP40    | AA522888  | 2.6   |
| plasminogen activator, tissue                                      | PLAT     | NM_000930 | 2.56  |
| ADAM metallopeptidase domain 23                                    | ADAM23   | NM_003812 | 2.22  |
| ADAM metallopeptidase with thrombospondin type 1 motif, 20         | ADAMTS20 | NM_025003 | 2.18  |
| matrix metallopeptidase 12 (macrophage elastase)                   | MMP12    | NM_002426 | 2.17  |
| ADAM metallopeptidase with thrombospondin type 1 motif, 1          | ADAMTS1  | AK023795  | 2.16  |
| TIMP metallopeptidase inhibitor 1                                  | TIMP1    | NM_003254 | 2.13  |

### RNA Processing

|                                                              |          |           |       |
|--------------------------------------------------------------|----------|-----------|-------|
| Nuclear cap binding protein subunit 1, 80kDa                 | NCBP1    | AA905353  | 11.8  |
| muscleblind-like 2 (Drosophila)                              | MBNL2    | AI088145  | 6.02  |
| mitochondrial ribosomal protein S25                          | MRPS25   | AW341440  | 2.72  |
| DEAD (Asp-Glu-Ala-Asp) box polypeptide 54                    | DDX54    | AI346600  | 2.59  |
| <b>Signaling</b>                                             |          |           |       |
| MCF.2 cell line derived transforming sequence                | MCF2     | AB085901  | 31.29 |
| synapsin II                                                  | SYN2     | NM_133625 | 16.22 |
| minor histocompatibility antigen HB-1                        | HB-1     | NM_021182 | 15.43 |
| Ras protein-specific guanine nucleotide-releasing factor 1   | RASGRF1  | AL359931  | 14.24 |
| guanine nucleotide binding protein (G protein), gamma 2      | GNG2     | AK026424  | 13.7  |
| adrenergic, alpha-1A-, receptor                              | ADRA1A   | D32201    | 12.78 |
| anaplastic lymphoma kinase (Ki-1)                            | ALK      | NM_004304 | 11.4  |
| regulator of G-protein signalling 18                         | RGS18    | AF076642  | 9.9   |
| urotensin 2                                                  | UTS2     | NM_021995 | 9.02  |
| urotensin 2                                                  | UTS2     | NM_021995 | 9.02  |
| thymus expressed gene 3-like                                 | MGC15476 | AI809234  | 8.84  |
| thioredoxin reductase 2                                      | TXNRD2   | AF201385  | 7.11  |
| complement component (3b/4b) receptor 1 (Knops blood group)  | CR1      | AI052659  | 6.99  |
| F-box protein 34                                             | FBXO34   | BC020583  | 6.44  |
| Guanine nucleotide binding protein (G protein), gamma 7      | GNG7     | AK001151  | 6.08  |
| S100 calcium binding protein A9 (calgranulin B)              | S100A9   | NM_002965 | 5.95  |
| Dihydropyrimidinase-like 3                                   | DPYSL3   | AW444511  | 5.84  |
| cholinergic receptor, nicotinic, beta 4                      | CHRNB4   | NM_000750 | 5.66  |
| klotho                                                       | KL       | NM_004795 | 5.47  |
| Gamma-aminobutyric acid (GABA) A receptor, beta 3            | GABRB3   | R59869    | 5.12  |
| ADAM metallopeptidase domain 10                              | ADAM10   | AF090948  | 5.04  |
| chemokine (C-X-C motif) ligand 6                             | CXCL6    | NM_002993 | 4.54  |
| RAP1, GTP-GDP dissociation stimulator 1                      | RAP1GDS1 | AI052055  | 4.3   |
| glutamate receptor, ionotropic, kainate 2                    | GRIK2    | BC037954  | 4.07  |
| thyroid stimulating hormone receptor                         | TSHR     | BE045816  | 3.93  |
| Calcium regulated heat stable protein 1, 24kDa               | CARHSP1  | BC041650  | 3.87  |
| fibroblast growth factor receptor 1                          | FGFR1    | NM_023107 | 3.77  |
| KDEL (Lys-Asp-Glu-Leu)                                       | KDELR3   | NM_016657 | 3.73  |
| delta-notch-like EGF repeat-containing transmembrane         | DNER     | BF059512  | 3.69  |
| G protein-coupled receptor 1                                 | GPR1     | AL046992  | 3.66  |
| Doublecortin and CaM kinase-like 1                           | DCAMKL1  | AI129626  | 3.47  |
| coagulation factor II (thrombin) receptor                    | F2R      | NM_001992 | 3.45  |
| G patch domain containing 2                                  | GPATC2   | AA160529  | 3.39  |
| fibroblast growth factor binding protein 1                   | FGFBP1   | NM_005130 | 3.39  |
| chemokine orphan receptor 1                                  | CMKOR1   | AI817041  | 3.35  |
| G protein-coupled receptor 4                                 | GPR4     | NM_005282 | 3.32  |
| Kinesin-associated protein 3                                 | KIFAP3   | AJ012497  | 3.29  |
| Chemokine binding protein 2                                  | CCBP2    | AI088640  | 3.19  |
| Ksp37 protein                                                | KSP37    | AB021123  | 3.18  |
| amyloid beta (A4) precursor protein                          | APP      | BC004369  | 3.15  |
| alpha-kinase 2                                               | ALPK2    | BE551416  | 3.14  |
| chemokine (C-X-C motif) receptor 4                           | CXCR4    | AJ224869  | 3.1   |
| EGF, latrophilin and seven transmembrane domain containing 1 | ELTD1    | NM_022159 | 3.08  |
| Fc fragment of IgE, high affinity I, receptor                | FCER1A   | BC005912  | 3.06  |
| dickkopf homolog 1 (Xenopus laevis)                          | DKK1     | NM_012242 | 3.03  |
| ras-related C3 botulinum toxin substrate 1                   | RAC1     | AJ012502  | 2.92  |
| ghrelin/obestatin preprohormone                              | GHRL     | AB035700  | 2.89  |

|                                                                     |         |           |      |
|---------------------------------------------------------------------|---------|-----------|------|
| Interleukin 12 receptor, beta 2                                     | IL12RB2 | R01220    | 2.88 |
| CUG triplet repeat, RNA binding protein 1                           | CUGBP1  | N52821    | 2.87 |
| stathmin 1/oncprotein 18                                            | STMN1   | AV756729  | 2.83 |
| RAS-like, estrogen-regulated, growth inhibitor                      | RERG    | AW294092  | 2.83 |
| RAB39B, member RAS oncogene family                                  | RAB39B  | AV724323  | 2.82 |
| phosphodiesterase 1A, calmodulin-dependent                          | PDE1A   | AU146305  | 2.82 |
| neurotrophic tyrosine kinase, receptor, type 2                      | NTRK2   | AA707199  | 2.8  |
| Hepatoma-derived growth factor, related protein 3                   | HDGFRP3 | AW207448  | 2.77 |
| transportin 3                                                       | TNPO3   | AF145029  | 2.77 |
| Cholinergic receptor, nicotinic, alpha 10                           | CHRNA10 | AA004906  | 2.75 |
| relaxin 1 /// relaxin 1                                             | RLN1    | BC005956  | 2.66 |
| secreted protein, acidic, cysteine-rich (osteonectin)               | SPARC   | AL575922  | 2.65 |
| Ras association (RalGDS/AF-6) domain family 5                       | RASSF5  | BC004270  | 2.64 |
| v-raf murine sarcoma 3611 viral oncogene homolog                    | ARAF    | AI760277  | 2.63 |
| SPARC related modular calcium binding 2                             | SMOC2   | AB014737  | 2.61 |
| Slit homolog 2 (Drosophila)                                         | SLIT2   | AI692523  | 2.58 |
| chimerin (chimaerin) 1                                              | CHN1    | BF339445  | 2.56 |
| CD53 molecule                                                       | CD53    | NM_000560 | 2.54 |
| chemokine (C-C motif) receptor-like 1                               | CCRL1   | NM_016557 | 2.49 |
| Fibroblast growth factor 18                                         | FGF18   | AI798863  | 2.48 |
| transforming growth factor, beta-induced, 68kDa                     | TGFB1   | NM_000358 | 2.47 |
| Stanniocalcin 1                                                     | STC1    | AW003173  | 2.47 |
| Taste receptor, type 2, member 14                                   | TAS2R14 | BF224068  | 2.46 |
| chemokine (C-X-C motif) ligand 12 (stromal cell-derived factor 1)   | CXCL12  | U19495    | 2.44 |
| platelet-derived growth factor receptor, alpha polypeptide          | PDGFRA  | NM_006206 | 2.44 |
| tubby like protein 3                                                | TULP3   | AI591305  | 2.43 |
| regulator of G-protein signalling 5                                 | RGS5    | NM_025226 | 2.43 |
| Rap guanine nucleotide exchange factor (GEF) 6                      | RAPGEF6 | BF003148  | 2.42 |
| chemokine (C-X-C motif) ligand 5                                    | CXCL5   | AK026546  | 2.4  |
| 5-hydroxytryptamine (serotonin) receptor 2A                         | HTR2A   | NM_000621 | 2.39 |
| diacylglycerol kinase, epsilon 64kDa                                | DGKE    | BC022297  | 2.36 |
| insulin-like growth factor binding protein 5                        | IGFBP5  | AW007532  | 2.36 |
| sclerostin domain containing 1                                      | SOSTDC1 | AI927000  | 2.31 |
| Muscle RAS oncogene homolog                                         | MRAS    | BE219446  | 2.29 |
| neuropilin 1                                                        | NRP1    | AF145712  | 2.28 |
| Rap guanine nucleotide exchange factor (GEF) 4                      | RAPGEF4 | NM_007023 | 2.27 |
| growth differentiation factor 11                                    | GDF11   | AF028333  | 2.25 |
| chordin-like 1                                                      | CHRDL1  | AL049176  | 2.25 |
| interleukin 1 receptor, type I                                      | IL1R1   | NM_000877 | 2.25 |
| prostaglandin E receptor 3 (subtype EP3)                            | PTGER3  | X83858    | 2.24 |
| vascular endothelial growth factor                                  | VEGF    | AF091352  | 2.21 |
| inversin /// inversin                                               | INVS    | BC006370  | 2.2  |
| Protein kinase C, epsilon                                           | PRKCE   | AL831856  | 2.18 |
| colony stimulating factor 2 receptor, beta, low-affinity            | CSF2RB  | AV756141  | 2.18 |
| coagulation factor II (thrombin) receptor-like 2                    | F2RL2   | AI378647  | 2.18 |
| Protein tyrosine phosphatase, non-receptor type 2                   | PTPN2   | N53696    | 2.15 |
| kinase insert domain receptor (a type III receptor tyrosine kinase) | KDR     | NM_002253 | 2.14 |
| interleukin 1 family, member 9                                      | IL1F9   | NM_019618 | 2.14 |
| thyroid hormone receptor interactor 10                              | TRIP10  | NM_004240 | 2.13 |
| mitochondrial tumor suppressor 1                                    | MTUS1   | AI695017  | 2.12 |
| secreted protein, acidic, cysteine-rich (osteonectin)               | SPARC   | NM_003118 | 2.11 |
| vascular endothelial growth factor                                  | VEGF    | AF022375  | 2.1  |
| regulator of G-protein signalling 7                                 | RGS7    | NM_002924 | 2.1  |
| suppressor of cytokine signaling 2                                  | SOCS2   | NM_003877 | 2.1  |

### Transcription

|                                                                   |         |           |       |
|-------------------------------------------------------------------|---------|-----------|-------|
| Transcription elongation regulator 1                              | TCERG1  | AI688461  | 27.02 |
| Cofactor required for Sp1 transcriptional activation, subunit 2   | CRSP2   | BC013392  | 18.82 |
| v-ets erythroblastosis virus E26 oncogene like (avian)            | ERG     | AA296657  | 11.52 |
| inscuteable                                                       | INSC    | BF432206  | 10.81 |
| MADS box transcription enhancer factor 2, polypeptide C           | MEF2C   | AW263527  | 10.57 |
| Early B-cell factor                                               | EBF     | AU145682  | 7.6   |
| interferon regulatory factor 8 /// interferon regulatory factor 8 | IRF8    | AI073984  | 4.75  |
| GATA binding protein 6                                            | GATA6   | BF002339  | 4.28  |
| AF4/FMR2 family, member 4                                         | AFF4    | BC025700  | 3.62  |
| vestigial like 3 (Drosophila)                                     | VGLL3   | AI754423  | 3.52  |
| ras responsive element binding protein 1                          | RREB1   | AU147182  | 3.48  |
| GATA binding protein 2                                            | GATA2   | AL563460  | 3.14  |
| Pre-B-cell leukemia transcription factor 1                        | PBX1    | AW074143  | 3.08  |
| Transducin-like enhancer of split 1 (E(sp1) homolog, Drosophila)  | TLE1    | AK000144  | 2.97  |
| musculin (activated B-cell factor-1)                              | MSC     | AF060154  | 2.91  |
| iroquois homeobox protein 3                                       | IRX3    | AI681917  | 2.83  |
| forkhead box E1 (thyroid transcription factor 2)                  | FOXE1   | NM_004473 | 2.8   |
| zinc finger protein 160                                           | ZNF160  | AA701249  | 2.72  |
| runt-related transcription factor 1                               | RUNX1   | NM_001754 | 2.67  |
| activating transcription factor 7 interacting protein             | ATF7IP  | AK021569  | 2.52  |
| mastermind-like 2 (Drosophila)                                    | MAML2   | AI769569  | 2.49  |
| v-maf musculoaponeurotic fibrosarcoma oncogene homolog            | MAF     | AF055376  | 2.49  |
| Spi-B transcription factor (Spi-1/PU.1 related)                   | SPIB    | NM_003121 | 2.48  |
| SRY (sex determining region Y)-box 9                              | SOX9    | NM_000346 | 2.47  |
| ataxin 3-like                                                     | ATXN3L  | AB050195  | 2.41  |
| zinc finger, DHHC-type containing 4                               | ZDHHC4  | NM_018106 | 2.4   |
| zinc finger protein 365                                           | ZNF365  | NM_014951 | 2.39  |
| Zinc finger protein 283                                           | ZNF283  | AW592246  | 2.38  |
| hepatic leukemia factor                                           | HLF     | M95585    | 2.33  |
| inhibitor of DNA binding 4                                        | ID4     | AW157094  | 2.33  |
| Pogo transposable element with ZNF domain                         | POGZ    | AW966903  | 2.32  |
| forkhead box C1                                                   | FOXC1   | NM_001453 | 2.32  |
| zinc finger protein, subfamily 1A, 4 (Eos)                        | ZNFN1A4 | NM_022465 | 2.27  |
| twist homolog 2 (Drosophila)                                      | TWIST2  | AI086614  | 2.25  |
| zinc finger protein 165                                           | ZNF165  | NM_003447 | 2.11  |
| homeobox, hematopoietically expressed                             | HHEX    | NM_001529 | 2.11  |

Supplementary Table S2. PCR primers

| Gene symbol      | Accession number | Forward Primer         | Reverse Primer        |
|------------------|------------------|------------------------|-----------------------|
| KRT17            | NM_000422        | TACCTGAAGAAGAACCAC     | CATCTCCACATTGATCTC    |
| KRTAP4-7         | AJ406939         | TGACTCTGTGAGAACATT     | ACTGAGAAGGAGAATCTG    |
| KRTAP3-2         | AJ406932         | TGCCAGATGTTAAGGTAG     | AACATGAATCTGAGGTCTT   |
| KRTAP1-3         | NM_030966        | CGATTTACCTTGAAACTGAG   | GTGGGATACAGGAAGTGA    |
| KRTAP9-9         | NM_030975        | TGCTCAACTGACTTATCT     | CACATGATTCACAAGGTAT   |
| TNFRSF10D        | NM_003840        | TTACGGATATAGTCATTCTAGG | ACTTCAGGCAGTTCTAAC    |
| TRAIL receptor 2 | AF016266         | TGTAAGATGTCACTGTCTG    | CCTGTAGAAGTTGCCAAT    |
| FAS              | NM_000043        | AGATACTAACTGCTCTCA     | TTACCATTGCTATGTATAAG  |
| CFLAR            | AF015452         | AACAAGAACCAGTGAAGA     | CGATTATCAGGCAGATTC    |
| KRT6a            | J00269           | AAGAAGGATGTGGATGCT     | ATACAAGGCTCTCAGGAA    |
| PDCD6            | NM_001267556     | TGAAGAGCAGCACAACAT     | TGAAGAGCAGCACAACAT    |
| CASP4            | NM_001225        | CATAGAACGACTGTCCAT     | TGCTCCTTGAAGTTGATT    |
| ACIN1            | XM_005267415     | ATCTTCCTCCTCCAGTTCTA   | ATCTGAGCGGTGAATGAG    |
| PDCD4            | NM_001199492     | GACAGTAATGAGCACAAC     | ACACAATCTACAGTTCCTT   |
| TNFSF15          | NM_001204344     | TTGGAGGATTGGCGAGTT     | TGTATAGCAGGAAGGTGTTGA |
| TRIAP1           | NM_016399        | ATTCTTCTTGACCTTGAC     | AATCTGATGGCTATGTTC    |
| BCL6B            | NM_181844        | CCTTGATTGATAGTTCTG     | TTATTGTTGAAGTTCTACC   |
| BCL10            | NM_003921        | ATCTTCTCTTCAACTACA     | TTCTTCTTCTTCTAACT     |
| TP53INP1         | NM_001135733     | TTGAGTGAGAAGACAGTT     | CATTGAGGAGGAAGAGAA    |
| BCL2             | NM_000633        | ACATCCTATCAACAACAA     | GTATCTACACTACAGTCTTA  |
| BCL2A1           | NM_001114735     | AGACGGCATCATTAACG      | CTCCTTATAGGTATCCACATC |

**Supplementary Table S3. Primary antibodies**

| <b>Antigen</b>                | <b>Dilution</b> | <b>Supplier</b>                                 | <b>Catalog number</b> |
|-------------------------------|-----------------|-------------------------------------------------|-----------------------|
| Ki67                          | 1:100           | Abcam                                           | ab15580               |
| p53 (phospho-S15)             | 1:100           | Abcam                                           | ab38497               |
| CD95/FAS/APO-1                | 1:1000          | BD Biosciences<br>Pharmingen                    | 554255                |
| P21 (M-19)                    | 1:1000          | Santa Cruz<br>Biotechnology                     | sc-471                |
| KAP1                          | 1:200           | Gift<br>of Drs. J. Schweizer<br>and L. Langbein | N/A                   |
| TRAIL                         | 1:100           | Cell Signaling<br>Technology                    | 3219                  |
| TRAIL Receptor 1<br>(DR-4-02) | 1:100           | Thermo Scientific<br>Pierce Antibodies          | MA1-19025             |
| FLIP                          | 1:100           | Abcam                                           | Ab167409              |
| Caspase-8                     | 1:2000          | IMGENEX                                         | IMG-5703              |
